# Supplementary material
Source: Research Square preprint supplement (doi:10.21203/rs.3.rs-6364577/v1)
Supplement: Supplementary file 1 [file 095b0a5ad939e8562d2dc7f8.docx]

<additional file>

1. General characteristics of missing values ​​removed during data preprocessing

Table 1. General characteristics of variables removed during data cleansing. *(N = 806)*

| Variable | Categories | N (%) |
| --- | --- | --- |
| Sex | Male | 337 (41.8) |
| Female | 469 (58.2) |
| Age | 19–29 | 81 (10.0) |
| 30–39 | 90 (11.2) |
| 40–49 | 105 (13.0) |
| 50–59 | 114 (14.1) |
| 60–64 | 72 (8.9) |
| 65 ≤ | 344 (42.7) |
| Residence area | Seoul | 103 (12.8) |
| Pusan | 50 (6.2) |
| Daegu | 56 (6.9) |
| Incheon | 42 (5.2) |
| Gwangju | 19 (2.4) |
| Daejeon | 21 (2.6) |
| Ulsan | 17 (2.1) |
| Sejong | 18 (2.2) |
| Gyeonggi | 180 (22.3) |
| Gangwon | 25 (3.1) |
| Chung-buk | 24 (3.0) |
| Chung-nam | 31 (3.8) |
| Jeon-buk | 28 (3.5) |
| Jeon-nam | 51 (6.3) |
| Kyung-buk | 59 (7.3) |
| Kyung-nam | 72 (8.9) |
| Jeju | 10 (1.2) |

2. Test for homogeneity of the population and analysis group

Table 2. Testing the homogeneity of the population and analysis group

| Variable | Categories | Population  (n = 4,674) | Analysis group  ≥ 19, (n = 3,868) | Pearson χ² | *p* |
| --- | --- | --- | --- | --- | --- |
| N (%) | |
| Sex | Male | 2004 (42.9) | 1667 (43.1) | 890.85 | <. 001 |
| Female | 2670 (57.1) | 2201(56.9) |
| Age | 19–29 | 527 (11.3) | 446 (11.5) | 14502.34 | <. 001 |
| 30–39 | 514 (11.0) | 422 (10.9) |
| 40–49 | 758 (16.2) | 655 (16.9) |
| 50–59 | 843 (18.0) | 729 (18.8) |
| 60–64 | 472 (10.1) | 400 (10.3) |
| ≥ 65 | 1560 (33.4) | 1216 (31.4) |
| Hypertension | Normal | 1981 (42.4) | 1691 (43.7) | 6022.47 | <. 001 |
| Prehypertension | 1007 (21.5) | 852 (22.0) |
| Hypertension | 1624 (34.7) | 1325 (34.3) |
| Null | 62 (1.3) | - |
| Diabetes Mellitus | Normal | 1715 (36.7) | 1493 (38.6) | 808.955 | <. 001 |
| Pre-Diabetes | 1956 (41.8) | 1718 (44.4) |
| Diabetes Mellitus | 755 (16.2) | 657 (17.0) |
| Null | 248 (5.3) | - |
| Obesity | Underweight | 209 (4.5) | 159 (4.1) | 8843.76 | <. 001 |
| Normal | 1642 (35.1) | 1377 (35.6) |
| pre-obesity | 1067 (22.8) | 914 (23.6) |
| 1ststage obesity | 1373 (29.4) | 1170 (30.2) |
| 2ndstage obesity | 251 (5.4) | 210 (5.4) |
| 3rdstage Obesity | 42 (0.9) | 38 (1.0) |
| Null | 90 (1.9) | - |
| Anemia | No | 3990 (85.4) | 3427 (88.6) | 16961.83 | <. 001 |
| Yes | 563 (12.0) | 441 (11.4) |
| Null | 121 (2.6) | - |
| Urine protein | Negative | 4190 (89.6) | 3527 (91.2) | 14334.27 | <. 001 |
| Trace | 276 (5.9) | 238 (6.2) |
| Positive (1+) | 83 (1.8) | 69 (1.8) |
| Positive (2+) | 40 (0.9) | 31 (0.8) |
| Positive (3+) | 5 (0.1) | 3 (0.1) |
| Positive (4+) | 1 (0.0) | - |
| Null | 79 (1.7) | - |
| Urine blood | Negative | 4241 (90.7) | 3570 (92.3) | 3492.86 | <. 001 |
| Trace | 199 (4.3) | 171 (4.4) |
| Positive (1+) | 63 (1.3) | 49 (1.3) |
| Positive (2+) | 48 (1.0) | 39 (1.0) |
| Positive (3+) | 44 (0.9) | 39 (1.0) |
| Null | 79 (1.7) | - |
| Smoking | Past smoker,  Nonsmoking | 3981 (85.2) | 3315 (85.7) | 3016.96 | <. 001 |
| Current smoking | 684 (14.6) | 553 (14.3) |
| Null | 9 (0.2) | - |
| Drinking | Nondrinking,  Drinking < one glass/month | 2491 (53.3) | 2015 (52.1) | 6983.86 | <. 001 |
| Drinking > one glass/month | 2178 (46.6) | 1853 (47.9) |
| Null | 5 (0.1) | - |
| Stress | Feel less | 3508 (75.1) | 2918 (75.4) | 1367.33 | <. 001 |
| Feel lot | 1155 (24.7) | 950 (24.6) |
| Null | 11 (0.2) |  |
| Anxiety | No (0–4) | 3950 (84.5) | 3299 (85.3) | 17881.74 | <. 001 |
| Mild (5–9) | 485 (10.4) | 387 (10.0) |
| Moderate (10–15) | 154 (3.3) | 130 (3.4) |
| Severe (16–21) | 62 (1.3) | 52 (1.3) |
| Null | 23 (0.5) | - |
| Subjective  health evaluation | Very Good | 232 (5.0) | 205 (5.3) | 1610220.09 | <. 001 |
| Good | 1212 (25.9) | 1083 (28.0) |
| Normal | 2055 (44.0) | 1810 (46.8) |
| Bad | 764 (16.3) | 628 (16.2) |
| Very Bad | 186 (4.0) | 142 (3.7) |
| Unknown,  nonresponse | 225 (4.8) | - |
| Activity limitations | Yes | 382 (8.2) | 296 (7.7) | 1697646.50 | <. 001 |
| No | 4052 (86.7) | 3572 (92.3) |
| Unknown,  nonresponse | 240 (5.1) | - |
| Aerobic  physical activity | Not practice | 2623 (56.1) | 2272 (58.7) | 1450.29 | <. 001 |
| Practice | 1794 (38.4) | 1596 (41.3) |
| Null | 257 (5.5) | - |
| Occupation | Manager | 66 (1.4) | 63 (1.6) | 1672397.09 | <. 001 |
| Expert | 880 (18.8) | 795 (20.6) |
| Office | 753 (16.1) | 672 (17.4) |
| Service | 519 (11.1) | 450 (11.6) |
| Sales | 500 (10.7) | 443 (11.5) |
| Agriculture, Fisheries | 332 (7.1) | 275 (7.1) |
| Technical | 385 (8.2) | 329 (8.5) |
| Device, Machine Operation, Assembling | 371 (7.9) | 319 (8.2) |
| Simple labor | 463 (9.9) | 398 (10.3) |
| Soldier | 18 (0.4) | 17 (0.4) |
| Unemployment,  not economically active population | 136 (2.9) | 102 (2.6) |
| Unknown, NonResponse | 251 (5.4) | 5 (0.1) |
| Marriage | Married (living together) | 3047 (65.2) | 2557 (66.1) | 28735.60 | <. 001 |
| Married (Separate) | 45 (1.0) | 36 (9.0) |
| Separation by death | 4664 (9.9) | 345 (8.4) |
| Divorced | 277 (5.9) | 227 (5.9) |
| Nonresponse,  Don’t know | 2 (0.0) | - |
| Comparison | 839 (18.0) | 703 (18.2) |
| Number of  household members | one person | 816 (17.5) | 639 (16.5) | 16664.10 | <. 001 |
| two persons | 1666 (35.6) | 1360 (35.2) |
| three persons | 1079 (23.1) | 902 (23.3) |
| four persons | 813 (17.4) | 713 (18.4) |
| five persons | 229 (4.9) | 196 (5.1) |
| six persons | 71 (1.5) | 58 (1.5) |
| Family household | one generation (one person) | 816 (17.5) | 639 (16.5) | 16337.01 | <. 001 |
| one generation (couple) | 1284 (27.5) | 1043 (27.0) |
| one generation (and so on) | 65 (1.4) | 56 (1.4) |
| two generations (couple+unmarried child) | 1685 (36.1) | 1458 (37.7) |
| two generations (lone parent+unmarried child) | 422 (9.0) | 349 (9.0) |
| two generations (and so on) | 190 (4.1) | 149 (3.9) |
| Three generations or more | 212 (4.5) | 174 (4.5) |
| Dietary composition | Enough, variety of good | 3000 (64.2) | 2501 (64.7) | 2154.57 | <. 001 |
| Enough, not variety of food | 1538 (32.9) | 1260 (32.6) |
| Sometimes, a lack of food | 115 (2.5) | 88 (2.3) |
| Often, a lack of food | 20 (0.4) | 18 (0.5) |
| Unknown, Nonresponse | 1 (0.0) | 1 (0) |
| Nutritional labelling  awareness | Yes | 3554 (76.0) | 3032 (78.4) | 29681.75 | <. 001 |
| No | 1120 (24.0) | 836 (21.6) |
| Economic activity state | Yes | 2617 (56.0) | 2234 (60.3) | 1699908.60 | <. 001 |
| No | 1810 (38.7) | 531 (39.6) |
| Nonresponse, Unknown | 247 (5.3) | 3 (1.0) |
| Recipient of basic living | Yes | 334 (7.1) | 259 (6.7) | 7097.61 | <. 001 |
| No | 4335 (92.7) | 3606 (93.2) |
| Nonresponse, Unknown | 5 (0.1) | 3 (1.0) |
| Health insurance | Local | 1485 (31.8) | 1229 (31.8) | 23839.83 | <. 001 |
| Workplace | 2945 (63.0) | 2462 (63.7) |
| Medical care | 244 (5.2) | 177 (4.6) |
| Personal insurance | Registered | 3586 (76.7) | 3084 (79.7) | 60953.51 | <. 001 |
| Not registered | 1040 (22.3) | 754 (19.5) |
| Unknown, Nonresponse | 48 (1.0) | 30 (8) |
| Home income | Low | 759 (16.2) | 575 (14.9) | 36523.27 | <. 001 |
| Mid-low | 889 (19.0) | 713 (18.4) |
| Middle | 965 (20.6) | 815 (21.1) |
| Upper-middle | 995 (21.3) | 843 (21.8) |
| Upper | 1043 (22.3) | 922 (23.8) |
| Null | 23 (0.5) | - |
| Individual income | Low | 936 (20.0) | 744 (19.2) | 23696.96 | <. 001 |
| Mid-low | 936 (20.0) | 773 (20.0) |
| Middle | 953 (20.4) | 777 (20.1) |
| Upper-middle | 911 (19.5) | 793 (20.5) |
| Upper | 915 (19.6) | 781 (20.2) |
| Null | 3 (0.5) | - |
| Education | Seodang, Hanhak | 1 (0.0) | - | 1721545.14 | <. 001 |
| Absence of schooling | 144 (3.1) | 112 (2.9) |
| Elementary school | 640 (13.7) | 534 (13.8) |
| Middle school | 465 (9.9) | 414 (10.7) |
| High school | 1196 (25.6) | 1050 (27.1) |
| College | 575 (12.3) | 506 (13.1) |
| University | 1176 (25.2) | 1037 (26.8) |
| Graduate school | 227 (4.9) | 212 (5.5) |
| Unknown, nonresponse | 250 (5.3) | 3 (1.0) |
| Medical examination | Yes | 3142 (67.2) | 2784 (72.0) | 1638667.25 | <. 001 |
| No | 1289 (27.6) | 1082 (28.0) |
| Unknown, nonresponse | 243 (5.2) | 2 (1.0) |
| Annual Unmet Need for Medical Clinics or Hospitals | Yes | 4079 (87.3) | 3614 (93.4) | 33.857 | <. 001 |
| No | 293 (6.3) | 254 (6.6) |
| Null | 302 (6.5) | - |
| Unmet Need for Necessary Medical Services | Yes | 293 (6.3) | 254 (6.6) | 2320621.35 | <. 001 |
| No | 4079 (87.3) | 3614 (93.4) |
| Not necessary | 63 (1.3) | - |
| Unknown, nonresponse | 239 (5.1) | - |
| House ownership | No | 1506 (32.2) | 1249 (32.3) | 4968.75 | <. 001 |
| One house | 2545 (54.5) | 2080 (53.8) |
| Two houses ≤ | 623 (13.3) | 539 (13.9) |
| Hosing type | Detached house | 1720 (36.8) | 1400 (36.2) | 3027.07 | <. 001 |
| Apartment | 2406 (51.5) | 2019 (52.2) |
| Townhouse,  Multi-unit house | 518 (11.1) | 421 (10.9) |
| and so on | 30 (0.6) | 28 (7) |
| Resident area | Seoul | 829 (17.7) | 726 (18.8) | 41688.72 | <. 001 |
| Pusan | 306 (6.5) | 256 (6.6) |
| Daegu | 219 (4.7) | 163 (4.2) |
| Incheon | 291 (6.2) | 249 (6.4) |
| Gwangju | 156 (3.3) | 137 (3.5) |
| Daejeon | 140 (3.0) | 119 (3.1) |
| Ulsan | 116 (2.5) | 99 (2.6) |
| Sejong | 105 (2.2) | 87 (2.2) |
| Gyeonggi | 1014 (21.7) | 834 (21.6) |
| Gangwon | 155 (3.3) | 130 (3.4) |
| Chung-buk | 161 (3.4) | 137 (3.5) |
| Chung-nam | 193 (4.1) | 62 (4.2) |
| Jeon-buk | 150 (3.2) | 122 (3.2) |
| Jeon-nam | 197 (4.2) | 146 (3.8) |
| Kyung-buk | 257 (5.5) | 198 (5.1) |
| Kyung-nam | 284 (6.1) | 212 (5.5) |
| Jeju | 101 (2.2) | 91 (2.4) |
| District (Dong)  Town (Eup)  & village  (Myeon) | Dong | 3589 (76.8) | 2995 (77.4) | 2185.954 | <. 001 |
| Eup, Myeon | 1085 (23.2) | 873 (22.8) |

*n = unweight, % = weight*

|  | Population (n = 4,674)  M ± SD | Analysis group (n = 3,868)  M ± SD | Range | Pearson | p-value |
| --- | --- | --- | --- | --- | --- |
| Water intake (cup) | 5.3 ± 3.1 | 5.2 ± 3.0 | 0–30 | -.011 | <. 001 |
| Water (g) | 1019.8 ± 590.6 | 1040.9 ± 558.9 | 18–5238 | .012 | <. 001 |
| Na (sodium) (mg) | 3101.0 ± 1879.5 | 3160 ± 1897.1 | 0–14983 | .013 | <. 001 |
| K (potassium) (mg) | 2678.9 ± 1274.8 | 272531 ± 1281.5 | 48–100090 | .012 | <. 001 |
| Protein (g) | 66.5 ± 35.9 | 67.7 ± 35.9 | 0–406 | .012 | < .001 |
| ull | 3 | - | - | - | - |

*M ± SD = weight*
